# Supplementary material for: Tumor-activated Neutrophils Promote Metastasis in Breast Cancer via the G-CSF-RLN2-MMP-9 Axis
Source: Research Square preprint supplement (doi:10.21203/rs.3.rs-1358848/v2), 2022-03-02
Supplement: Supplementary file 1 [file 84416dac510cef1d6b82e2f8.docx]

**Table S1. Summary of clinical characteristics of patients with breast cancer in IHC study.**

| **Characteristics** | **Number of Patients** | | |
| --- | --- | --- | --- |
| **Training cohort** | **Validation cohort** | **Independent cohrot** |
| **Age (year)** |  |  |  |
| ＜50  ≥50 | 79  91 | 56  74 | 43  57 |
| **T** |  |  |  |
| T≥3cm | 103 | 77 | 45 |
| T<3cm | 67 | 53 | 55 |
| **Lymph nodes involvement** |  |  |  |
| + | 90 | 80 | 45 |
| - | 80 | 50 | 55 |
| **ER statue** |  |  |  |
| + | 76 | 104 | 65 |
| - | 94 | 26 | 35 |
| **PR statue** |  |  |  |
| **+** | 71 | 104 | 74 |
| - | 99 | 26 | 26 |
| **HER2** **overexpression** |  |  |  |
| + | 39 | 33 | 31 |
| **-** | 131 | 97 | 69 |
| **Ki67 index** |  |  |  |
| >30% | 90 | 55 | 63 |
| ≤30% | 80 | 75 | 37 |
| **Pathological grade** |  |  |  |
| I-II | 107 | 77 | 62 |
| III | 63 | 53 | 38 |
| **Clinical stage** |  |  |  |
| 1-2 | 70 | 81 | 69 |
| 3 | 100 | 49 | 31 |
