# Supplementary material for: Tumor-activated Neutrophils Promote Metastasis in Breast Cancer via the G-CSF-RLN2-MMP-9 Axis
Source: Research Square preprint supplement (doi:10.21203/rs.3.rs-1358848/v2), 2022-03-02
Supplement: Supplementary file 2 [file 8a8af229c29553a4631034a3.docx]

**Table S3. Primers used for RT-PCR and vector construction.**

| **Gene** | **Forward （5’-3’）** | **Reverse （5’-3’）** |
| --- | --- | --- |
| MMP9 | ACTGTGACGCCACGTGACA | CCTCGTATACCGCATCAATCTTT |
| RXFP1 | CAAGTGCTCCCTTGGCTATTTC | TGTCCTCATCGGCCTGATTC |
| GAPDH | GGCATGGACTGTGGTCATGAG | TGCACCACCAACTGCTTAGC |
| siMMP-9 | CGCUCAUGUACCCUAUGUATT | UACAUAGGGUACAUGAGCGTT |
| si-RXFP1 | GGUAUUAAUUUGGCCGCAUTT | AUGCGGCCAAAUUAAUACCTT |
| si-NC | UUCUCCGAACGUGUCACGUTT | ACGUGACACGUUCGGAGAATT |
